# Supplementary material for: Identification using LC-MSn of co-metabolites in the biosynthesis of the polyketide toxin mycolactone by a clinical isolate of Mycobacterium ulceransElectronic supplementary information (ESI) available: Experimental procedures and ESI-CID-MS/MS spectra of mycolactone and the five co-metabolites; MS3 spectrum of m/z 661 from the MS/MS of m/z 749; scheme showing the losses of mass 88 (C4H8O2) during the MS/MS of m/z 749 and the MS3 of m/z 661. See http://www.rsc.org/suppdata/cc/b3/b308163j/
Source: Royal Society of Chemistry journal article supplement (doi:10.1039/b308163j), 2003-01-01
Supplement: b308163j.doc [file b308163j.doc]

# Supplementary data

On-line ESI-LC-MS and ESI-LC-MS/MS (Helium collision gas) analyses were carried out on a Finnigan LCQ (Thermo Finnigan, USA), coupled with a HP1100 LC fitted with ThermoHypersil BDS C8 column (5 m, 4.6  250 mm). High-resolution and accurate-mass analyses were performed by ESI on a Q-TOF (Micromass, UK).

*M. ulcerans* strain Agy99 (isolated from a patient in Ghana in 1999) was cultured in Dubos broth at 30°C for eight weeks. Cells were harvested by centrifugation and acetone soluble lipids (including mycolactones) were extracted by the method of Rohr as previously described3. Samples were applied to the LC in methanol and eluted with a 40 min gradient from 55 to 95% acetonitrile in water.

Mycolactone and its co-metabolites were collected individually from the column, and lyophilised. Samples were then dissolved in a mixture (1:1) of D2O (100%) and CD3OD (99.8% D) and left at room temperature for about 20 min. Analyses were performed on the LCQ using a syringe pump operated at 8 l/min.
