# Supplementary material for: Identification using LC-MSn of co-metabolites in the biosynthesis of the polyketide toxin mycolactone by a clinical isolate of Mycobacterium ulceransElectronic supplementary information (ESI) available: Experimental procedures and ESI-CID-MS/MS spectra of mycolactone and the five co-metabolites; MS3 spectrum of m/z 661 from the MS/MS of m/z 749; scheme showing the losses of mass 88 (C4H8O2) during the MS/MS of m/z 749 and the MS3 of m/z 661. See http://www.rsc.org/suppdata/cc/b3/b308163j/
Source: Royal Society of Chemistry journal article supplement (doi:10.1039/b308163j), 2003-01-01
Supplement: b308163j.pdf [file b308163j.pdf]

# Identification using LC-MS<sup>n</sup> of Co-metabolites in the Biosynthesis of the Polyketide Toxin Mycolactone by a Clinical Isolate of *Mycobacterium ulcerans*

Hui Hong,<sup>a</sup> Paul J. Gates,<sup>a</sup> James Staunton,<sup>a</sup> Tim Stinear,<sup>b</sup> Stuart T. Cole,<sup>b</sup> Peter F. Leadlay<sup>a, b</sup> and Jonathan B. Spencer<sup>a \*</sup>

<sup>a</sup> Departments of Chemistry and Biochemistry, University of Cambridge, Cambridge, UK.

E-mail: jbs20@cam.ac.uk; Fax: 01223 336362; Tel: 01223 331696.

<sup>b</sup> Unité de Génétique Moléculaire Bactérienne, Institut Pasteur, Paris, France.

*This submission was created using the RSC Communication Template (DO NOT DELETE THIS TEXT)  
(LINE INCLUDED FOR SPACING ONLY - DO NOT DELETE THIS TEXT)*

**Supplementary information:**

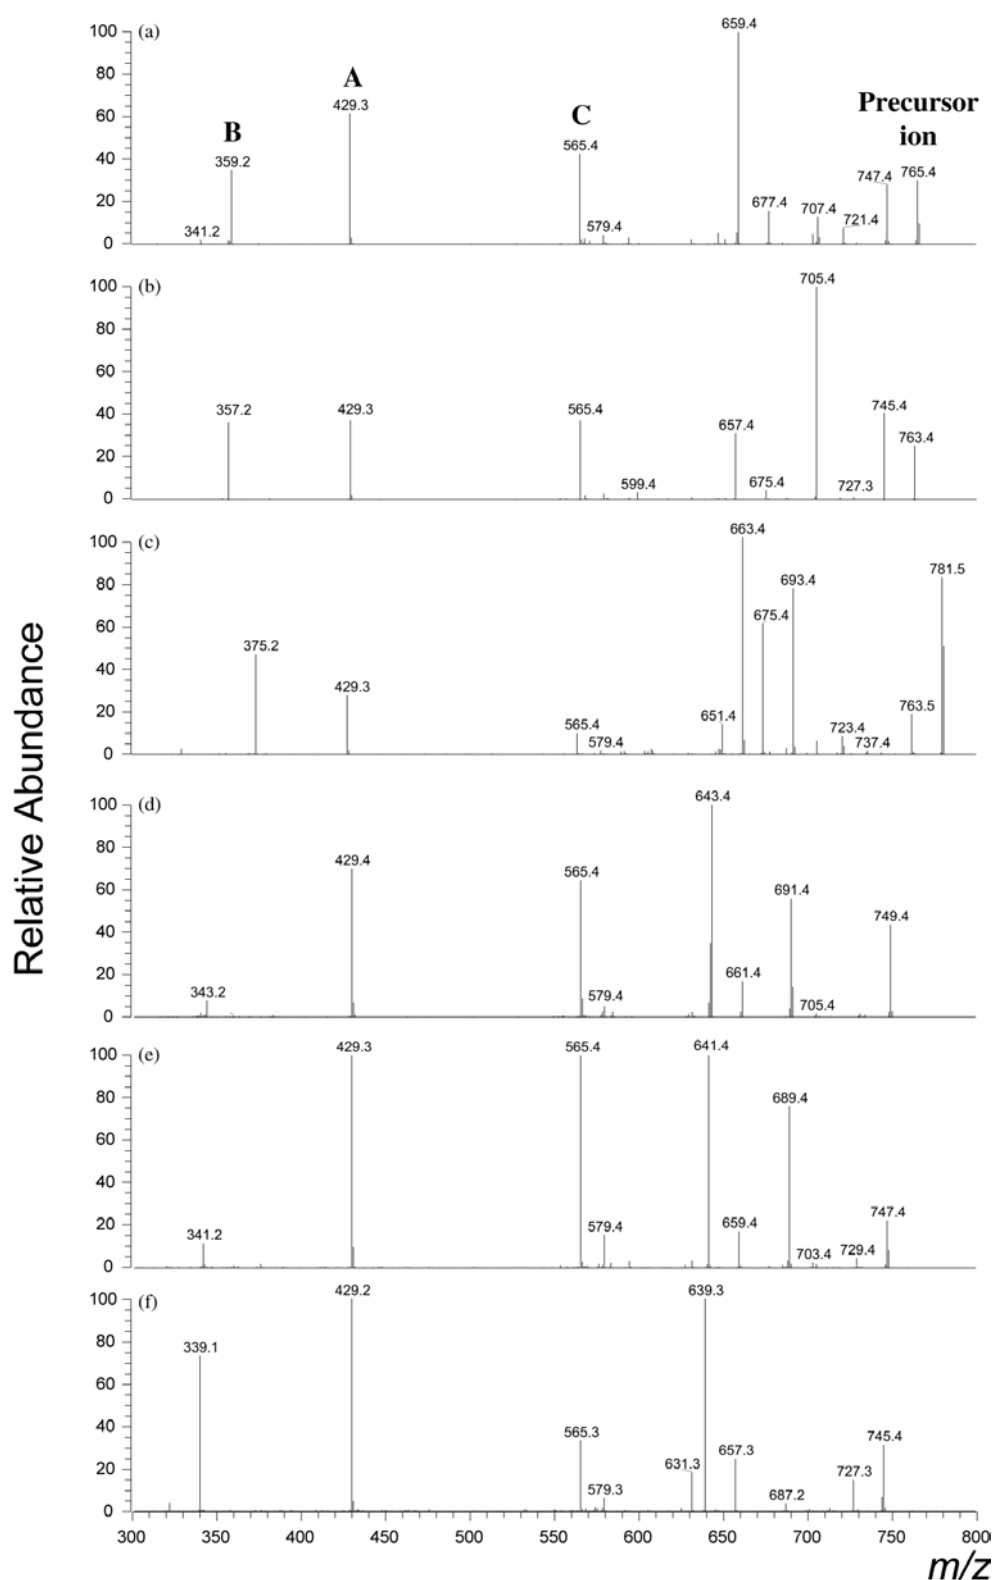

**Figure S1.** The ESI-CID-MS/MS spectra (LCQ) of mycolactone (a) and the 5 co-metabolites. The precursor ions ( $m/z$  765.4, 763.4, 781.5, 749.4, 747.4 745.4) were isolated ( $\pm 1$   $m/z$  isolation window) before fragmentation. Ions A and C ( $m/z$  429 and 565) are present in all the spectra. Ion B varies in mass by the same amount as the precursor ion. This demonstrates that the structural alterations in the co-metabolites are all confined to within ion B – corresponding to the fatty acid side chain.

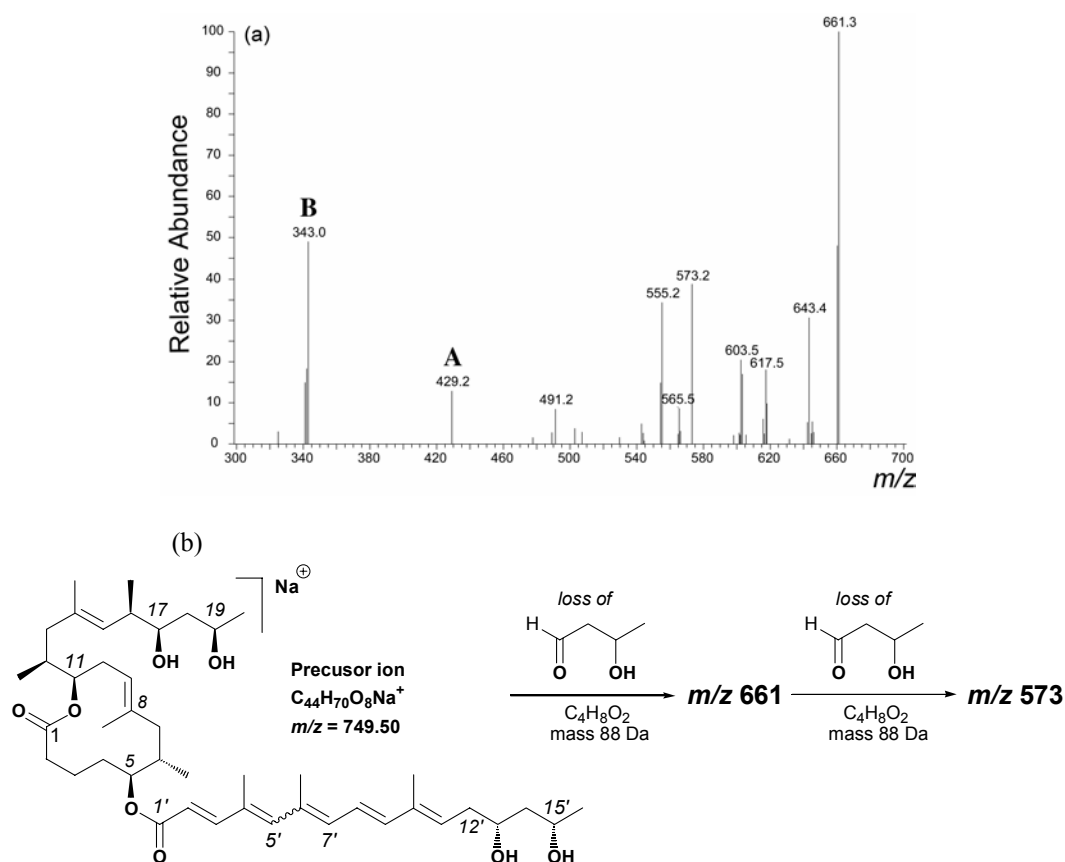

**Figure S2.** (a)  $MS^3$  spectrum of  $m/z$  661 from the  $MS/MS$  of  $m/z$  749. Fragment ions **A** and **B** are labelled. (b) Scheme showing the losses of mass 88 ( $C_4H_8O_2$ ) during the  $MS/MS$  of  $m/z$  749 and the  $MS^3$  of  $m/z$  661. The first loss of mass 88 can either be  $C17 - C20$  or  $C13' - C16'$ . A further loss of mass 88 then occurs in the  $MS^3$  to form  $m/z$  573, which confirms that  $C13' - C16'$  retains the same sub-structure as in mycolactone. The presence of both ions **A** and **B** in the spectrum demonstrate that the two losses of mass 88 can occur in parallel, therefore showing that  $m/z$  661 is a mixture of two species.
